# Supplementary material for: Rapid screening and identification of non-target flavonoid components in invasive weeds by LC/MS-IT-TOF
Source: Royal Society of Chemistry journal article supplement (doi:10.1039/c5ay02186c), 2015-01-01
Supplement: c5ay02186c1.pdf [file c5ay02186c1.pdf]

## Rapid screening and identification of nontarget flavonoid components from invasive weeds by LC/MS-IT-TOF

Minchao Wang<sup>a</sup>, Aocheng Cao<sup>b</sup>, Canbin Ouyang<sup>b</sup>, Yuan Li<sup>b</sup>, Yun Wei<sup>a,\*</sup>

<sup>a</sup> State Key Laboratory of Chemical Resource Engineering, Beijing University of Chemical Technology, Beijing 100029, PR China;

<sup>b</sup> Institute of Plant Protection, Chinese Academy of Agricultural Sciences, Beijing, 100193, P. R. China

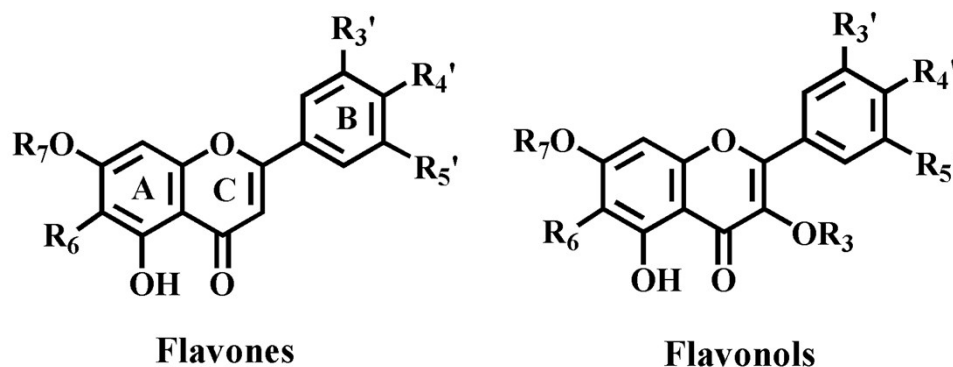

**Fig. S1** the structures of flavones and flavonols.

---

\*Corresponding author: Yun Wei, Tel & fax: 0086 10 64442928. E-mail: [weiyun@mail.buct.edu.cn](mailto:weiyun@mail.buct.edu.cn)

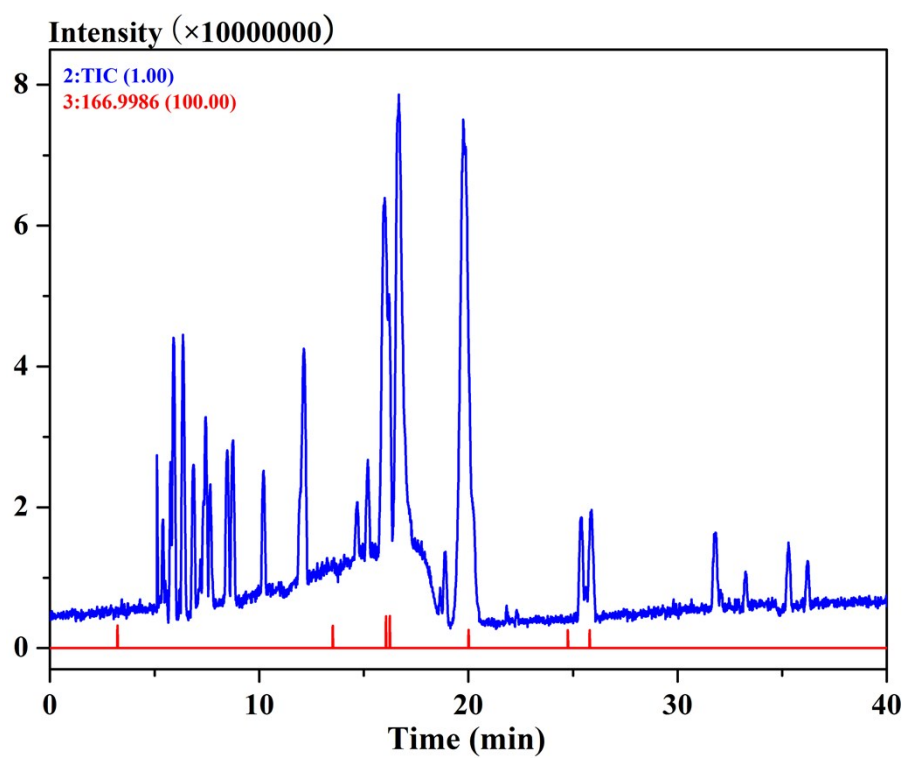

**Fig. S2** total ion chromatogram and the extracted ion chromatogram of MS<sup>2</sup> fragment ion at  $m/z$  166.9986 of the *F. bidentis*.
